# Supplementary material
Source: PubMed Central journal article supplement (PMC10773966)
Supplement: NIHMS1952636-supplement-1.pdf [file NIHMS1952636-supplement-1.pdf]

eTable 1. Additional operational tools used in TIN consultations and trials

eTable 1 References

eFigure 1. Summary of TIN's dissemination

eTable 2. Selected TIN publications across the clinical trial lifecycle

eTable 2 References

**eTable 1. Additional operational tools used in TIN consultations and trials**

|                                | Innovation                                                      | Description                                                                                                                                                                                                                                                                                                           | Implementation                                                                                                                                                                                                                                                                                                                                                                                                                                                                                      |
|--------------------------------|-----------------------------------------------------------------|-----------------------------------------------------------------------------------------------------------------------------------------------------------------------------------------------------------------------------------------------------------------------------------------------------------------------|-----------------------------------------------------------------------------------------------------------------------------------------------------------------------------------------------------------------------------------------------------------------------------------------------------------------------------------------------------------------------------------------------------------------------------------------------------------------------------------------------------|
| Study Design                   | <b>Master protocol</b>                                          | Master protocol design, incorporating a single infrastructure and trial design that can evaluate multiple drugs and/or devices, or disease populations.                                                                                                                                                               | <ul style="list-style-type: none"> <li>Used in two trials where 8 different drug/dose combinations have been tested.</li> <li>Lessons learned include understanding that the enrollment process may be more complicated with multiple drugs being studied. This may be mitigated by providing a streamlined description of each drug in the model informed consent form and by providing sites with aids, such as an informational video or flip chart to assist in the consent process.</li> </ul> |
|                                | <b>Adaptive design</b>                                          | A clinical trial design that allows for modification to a trial and/or statistical procedures of a trial after its initiation to maximize efficiency and/or speed up clinical development.                                                                                                                            | <ul style="list-style-type: none"> <li>Used in two trials. In one, three arms were opened, and one arm discontinued. In the other trial, 6 arms have opened to date and 5 arms have been closed.</li> <li>Lessons learned include taking care to plan the opening and closing of arms with the protocol team as needed and the data management team and randomization team to insure a smooth transition.</li> </ul>                                                                                |
| IRB including Informed Consent | <b>Single IRB Coordination during Study Startup<sup>1</sup></b> | SIRB coordination includes the incorporation of personnel to help navigate and coordinate SIRB activities. This role may eliminate inefficiencies in the SIRB and HRPP review process by decreasing the time it takes participating sites to obtain site SIRB approval and HRPP activation prior to study enrollment. | <ul style="list-style-type: none"> <li>Data has been collected on over 30 multi-center trials receiving SIRB coordination support.</li> </ul>                                                                                                                                                                                                                                                                                                                                                       |
|                                | <b>Informational video</b>                                      | Informational videos about clinical trials are used to explain the requirements of the trial, help recruit participants for the trial and assist with the informed consent process, either remotely or in person.                                                                                                     | <ul style="list-style-type: none"> <li>Trial informational videos were created for 8 studies.</li> <li>Lessons learned include obtaining IRB approval prior to any filming and being sure to account for potential protocol changes that could require video editing.</li> </ul>                                                                                                                                                                                                                    |
|                                | <b>iConsent</b>                                                 | I-Consent is a web-based tool that works in conjunction with REDCap. It provides frameworks for investigators to customize the concise consent summary utilizing interactive techniques (e.g., videos,                                                                                                                | <ul style="list-style-type: none"> <li>A trial piloted the use of two iConsent methods (video versus infographic) for obtaining consent from patients for participation in a clinical trial. Our hypothesis is that iConsent may increase</li> </ul>                                                                                                                                                                                                                                                |

|                                    |                                                                                        |                                                                                                                                                                                                                                                                                                                                                                                                                                      |                                                                                                                                                                                                                                                                                                                |
|------------------------------------|----------------------------------------------------------------------------------------|--------------------------------------------------------------------------------------------------------------------------------------------------------------------------------------------------------------------------------------------------------------------------------------------------------------------------------------------------------------------------------------------------------------------------------------|----------------------------------------------------------------------------------------------------------------------------------------------------------------------------------------------------------------------------------------------------------------------------------------------------------------|
|                                    |                                                                                        | infographics) based on adult learning theories for use in real-world research studies within a user-friendly human-computer interface.                                                                                                                                                                                                                                                                                               | comprehension or improve participant autonomy.                                                                                                                                                                                                                                                                 |
| <b>Site selection and Start up</b> | <b>COVID Trials Rapid Study Startup in Under Two Weeks<sup>2</sup></b>                 | Emergency support for rapid study start-up was critical during the early outbreak of the COVID-19 global pandemic. By using expertise in various domains (data management, bioinformatics, site management, study management) at four academic medical centers, two large randomized clinical trials were developed and initiated to study the effects of a specific drug in outpatients with confirmed COVID-19 in under two weeks. | <ul style="list-style-type: none"> <li>Timelines associated with rapid study start-up include 1) establishment of a DSMB and approved DSMB charter (3 days), 2) FDA-approved IND exemption (&lt;90 minutes), IRB submission to approval (5 days), and 4) IRB approval to first patient in (5 days).</li> </ul> |
| <b>Enrollment</b>                  | <b>Guidelines for Developing Culturally Tailored Recruitment Materials<sup>3</sup></b> | Culturally appropriate, minority recruitment material (MRM) guidelines developed using a multi-layered approach. The literature related to application of cultural targeting strategies to develop recruitment materials served as the foundation for guideline development integrated with input of African Americans and Latinos on strategies to increase reach of recruitment materials in clinical trials.                      | <ul style="list-style-type: none"> <li>Metrics under development</li> </ul>                                                                                                                                                                                                                                    |
| <b>Study Conduct</b>               | <b>The 3-3-3 Approach<sup>4</sup></b>                                                  | Risk Assessment and Risk Management (RARM) is a simplified tool designed to meet the demands of an academic medical center. It was developed to prioritize risk management activities around critical aspects of a research study.                                                                                                                                                                                                   | <ul style="list-style-type: none"> <li>Used in approximately 30 multi-center trials.</li> <li>Tool was developed through an iterative process of pilot testing and revising to achieve a simplified, seamless, approach to risk assessment and risk management.</li> </ul>                                     |
|                                    | <b>Risk-Based, Study-Specific Training Program<sup>5</sup></b>                         | A competency-based training program was designed to support high levels of competency and performance in clinical research coordinators (CRCs) working on a clinical trial. The training program, which incorporates Joint Task Force Competency Domains and ICH E6(R2) risk assessment processes, was targeted toward high- and moderate-risk protocol activities.                                                                  | <ul style="list-style-type: none"> <li>A focused approach helped CRCs feel competent in the high- to moderate-risk areas of the trial as well as standard areas of research.</li> </ul>                                                                                                                        |

## eTable 1 References

1. Johnson AR, Kasimatis Singleton M, Ozier J, et al. Key lessons and strategies for implementing single IRB review in the Trial Innovation Network. *J Clin Transl Sci*. 2022;6(1):e53. doi:10.1017/cts.2022.391
2. Burr J, Pacchia N, Sorenson S. COVID trials rapid study startup in under two weeks: How did we do it? Virtual ACRP. 2021. <https://acrpnet.org/courses/virtual-acrp-2021-innovation-in-the-era-of-covid-track-replay/>
3. Cunningham-Erves J, Kusnoor SV, Villalta-Gil V, et al. Development and pilot implementation of guidelines for culturally tailored research recruitment materials for African Americans and Latinos. *BMC Med Res Methodol*. 2022;22(1):248. doi:10.1186/s12874-022-01724-4
4. VanBuren JM, Roalstad S, Kay MT, Zuspan SJ, Dean JM, Brulotte M. Development of a risk assessment and risk management tool for an academic research organization. *Contemp Clin Trials*. 2022;119:106812. doi:10.1016/j.cct.2022.106812
5. Fritter J, Metheney M, Zuspan SJ. Impact of a risk-based, study-specific training program on research coordinator competency. *Clinical Researcher*. 2020;34(6). <https://www.acrpnet.org/2020/06/09/impact-of-a-risk-based-study-specific-training-program-on-research-coordinator-competency/>

eFigure 1. Summary of TIN's dissemination

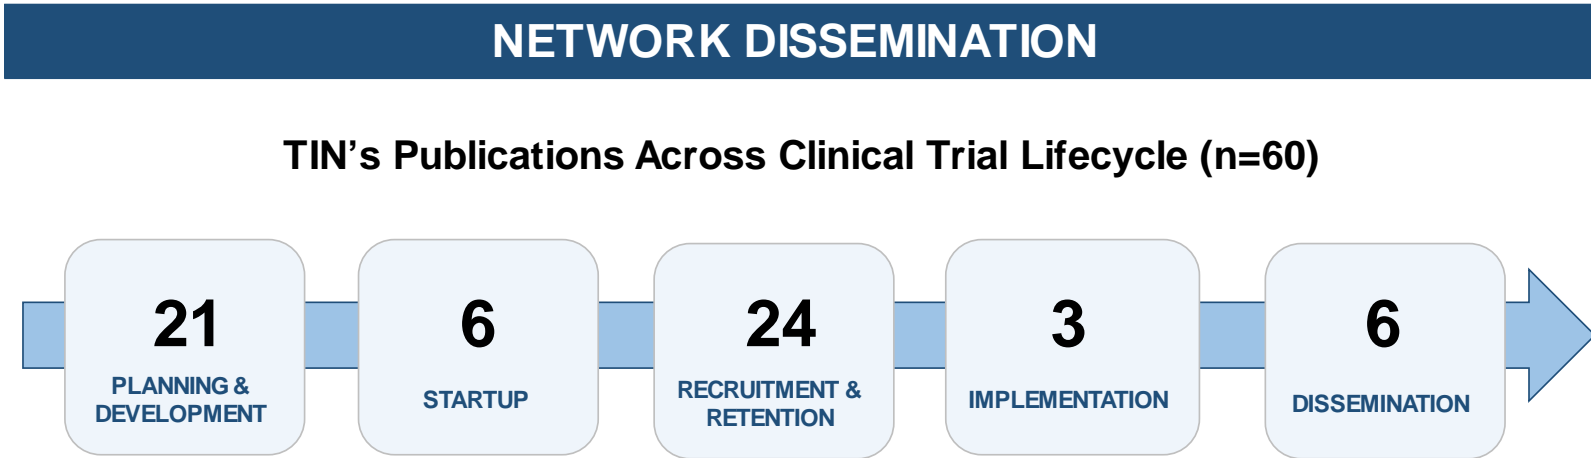

**eTable 2. Selected TIN publications across the clinical trial lifecycle**

| TIN Publication                                                                                                                                                                          | Planning & Development | Study Start-up | Recruitment & Retention | Implementation | Dissemination |
|------------------------------------------------------------------------------------------------------------------------------------------------------------------------------------------|------------------------|----------------|-------------------------|----------------|---------------|
| CPCCRN Demo Lessons Learned from SMART IRB & IREx <sup>1</sup>                                                                                                                           | X                      |                |                         |                |               |
| Using Single IRB Consultations to Meet the Educational Needs of Investigative Teams <sup>2</sup>                                                                                         | X                      |                |                         |                |               |
| Consent Builder: An innovative tool for creating research informed consent documents <sup>3</sup>                                                                                        |                        | X              |                         |                |               |
| Key Lessons and Strategies for Implementing Single IRB in the Trial Innovation Network <sup>4</sup>                                                                                      | X                      |                |                         |                |               |
| The IRB Reliance Exchange (IREx): A national web-based platform for operationalizing single IRB review <sup>5</sup>                                                                      |                        | X              |                         |                |               |
| Approach to Reviewing Local Context for EFIC Trials Using SIRB <sup>6</sup>                                                                                                              | X                      |                |                         |                |               |
| Development of a Risk Assessment and Risk Management Tool for an Academic Research Organization <sup>7</sup>                                                                             |                        | X              |                         |                |               |
| Using gamification to benchmark clinical trial site performance <sup>8</sup>                                                                                                             |                        |                |                         | X              |               |
| DSMBc in COVID-19 studies <sup>9</sup>                                                                                                                                                   |                        |                |                         |                | X             |
| Decentralized Clinical Trials: Perspectives for Clinical Research Professionals <sup>10</sup>                                                                                            | X                      |                |                         |                |               |
| Broadly Engaged Team Science Comes to Life in a Design Lab <sup>11</sup>                                                                                                                 | X                      |                |                         |                |               |
| Bayesian Adaptive Design TIC-TOC <sup>12</sup>                                                                                                                                           | X                      |                |                         |                |               |
| Incentive Delivery Timing & Follow-up Survey Completion in a Prospective Cohort Study of Injured Children: A Randomized Experiment Comparing Prepaid & Postpaid Incentives <sup>13</sup> |                        |                | X                       |                |               |
| Clinical Trial Agreements <sup>14</sup>                                                                                                                                                  |                        | X              |                         |                |               |
| Impact of a Risk-Based, Study-Specific Training Program on Research Coordinator Competency <sup>15</sup>                                                                                 |                        | X              |                         |                |               |
| Efficacy and Effectiveness Too Trials: Clinical Trial Designs to Generate Evidence on Efficacy and on Effectiveness in Wide Practice <sup>16</sup>                                       | X                      |                |                         |                |               |
| An example of medical device-based projection of clinical trial enrollment <sup>17</sup>                                                                                                 | X                      |                |                         |                |               |

|                                                                                                                                                                                 |   |   |   |   |   |
|---------------------------------------------------------------------------------------------------------------------------------------------------------------------------------|---|---|---|---|---|
| Efficacy-to-Effectiveness Clinical Trials <sup>18</sup>                                                                                                                         | X |   |   |   |   |
| REDCap on FHIR: Clinical Data Interoperability Services <sup>19</sup>                                                                                                           |   |   |   | X |   |
| Creating and Implementing a COVID-19 Recruitment Data Mart <sup>20</sup>                                                                                                        | X |   | X |   |   |
| Using a multicultural and multilingual awareness-raising strategy to enhance enrollment of racially underrepresented minoritized communities – the PassITON trial <sup>21</sup> |   |   | X |   |   |
| Development and Validation of the Perceptions of Research Trustworthiness (PORT) Scale <sup>22</sup>                                                                            | X |   | X |   | X |
| Selecting EHR-driven Recruitment Strategies: An Evidence-Based Decision Guide <sup>23</sup>                                                                                     | X |   | X |   |   |
| Development and pilot implementation of guidelines for culturally tailored research recruitment materials for African Americans and Latinos <sup>24</sup>                       | X |   | X |   |   |
| MyCap: a flexible and configurable platform for mobilizing the participant voice <sup>25</sup>                                                                                  | X |   | X |   |   |
| Recruitment and Retention for Chronic Pain Clinical Trials: A Narrative Review <sup>26</sup>                                                                                    |   |   | X |   |   |
| What we wish every investigator knew – Top 4 recruitment and retention considerations from the Recruitment Innovation Center <sup>27</sup>                                      | X |   | X |   | X |
| “Send My Information”: Increasing Public Accessibility to Clinical Trials by Facilitating Participant Expression of Interest <sup>28</sup>                                      |   |   | X |   |   |
| How do Hispanics/Latinos Perceive and Value the Return of Research Results? <sup>29</sup>                                                                                       |   |   | X |   | X |
| EHR-based Cohort Assessment: A Fast and Flexible Model for Identifying Study Populations in Support of Multi-site Clinical Trials <sup>30</sup>                                 | X |   | X |   |   |
| Effects of financial incentives on volunteering for clinical trials: A randomized vignette experiment <sup>31</sup>                                                             |   |   | X |   |   |
| The Recruitment Innovation Center: Developing Novel, Person-centered Strategies for Clinical Trial Recruitment and Retention <sup>32</sup>                                      | X | X | X |   |   |
| Engaging smokers in research: Utility of Facebook in facilitating recruitment to a smoking cessation study <sup>33</sup>                                                        |   |   | X |   |   |

|                                                                                                                                                         |   |  |   |   |   |
|---------------------------------------------------------------------------------------------------------------------------------------------------------|---|--|---|---|---|
| Design and implementation of a massive open online course on enhancing the recruitment of minorities in clinical trials – Faster Together <sup>34</sup> | X |  | X | X |   |
| Opening doors to clinical trial participation among Hispanics: Lessons learned from the Spanish translation of ResearchMatch <sup>35</sup>              | X |  | X |   |   |
| A REDCap-based model for electronic consent (eConsent): Moving toward a more personalized consent <sup>36</sup>                                         | X |  | X |   |   |
| The Impact of an Educational Video on Clinical Trial Enrollment and Knowledge in Ethnic Minorities: A Randomized Control Trial <sup>37</sup>            |   |  | X |   |   |
| To end disease tomorrow, begin with trials today: Digital strategies for increased awareness of a clinical trials finder <sup>38</sup>                  |   |  | X |   |   |
| Association of Health Literacy and Numeracy with Interest in Research Participation <sup>39</sup>                                                       |   |  | X |   |   |
| Understanding What Information Is Valued By Research Participants, And Why <sup>40</sup>                                                                |   |  | X |   | X |
| Effective Engagement Requires Trust and Being Trustworthy <sup>41</sup>                                                                                 |   |  | X |   | X |
| Connecting the public with clinical trial options: The ResearchMatch Trials Today tool <sup>42</sup>                                                    |   |  | X |   |   |

Table excludes study-specific publications



## eTable 2 References

1. Burr JS, Johnson A, Risenmay A, et al. Demonstration Project: Transitioning a Research Network to New Single IRB Platforms. *Ethics Hum Res.* 2022;44(6):32-38. doi:10.1002/eahr.500149
2. Johnson AR, Pautler M, Burr JS, et al. Using single IRB consultations to meet the educational needs of investigative teams. *Contemp Clin Trials Commun.* 2022;29:100971. doi:10.1016/j.conctc.2022.100971
3. Sward KA, Enriquez R, Burr J, et al. *Consent Builder*: an innovative tool for creating research informed consent documents. *JAMIA Open.* 2022;5(3):ooac069. doi:10.1093/jamiaopen/ooac069
4. Johnson AR, Kasimatis Singleton M, Ozier J, et al. Key lessons and strategies for implementing single IRB review in the Trial Innovation Network. *J Clin Transl Sci.* 2022;6(1):e53. doi:10.1017/cts.2022.391
5. Serdoz ES, Edwards T, Pulley J, et al. The IRB Reliance Exchange (IREx): A national web-based platform for operationalizing single IRB review. *J Clin Transl Sci.* 2022;6(1):e39. doi:10.1017/cts.2022.376
6. Johnson AR, Rigtrup LM, VanBuren J, Rothwell E, Dean JM. An Approach to Reviewing Local Context for Exception from Informed Consent Trials Using a Single IRB. *Ethics Hum Res.* 2021;43(6):42-48. doi:10.1002/eahr.500109
7. VanBuren JM, Roalstad S, Kay MT, Zuspan SJ, Dean JM, Brulotte M. Development of a risk assessment and risk management tool for an academic research organization. *Contemp Clin Trials.* 2022;119:106812. doi:10.1016/j.cct.2022.106812
8. Lane K, Majkowski R, Gruber J, et al. Using gamification to enhance clinical trial start-up activities. *J Clin Transl Sci.* 2022;6(1):e75. doi:10.1017/cts.2022.405
9. Dilts NA, Harrell FE, Lindsell CJ, et al. Securely sharing DSMB reports to speed decision making from multiple, concurrent, independent studies of similar treatments in COVID-19. *J Clin Transl Sci.* 2022;6(1):e49. doi:10.1017/cts.2022.387
10. Burr J, Stein JM, Jurnak J. Decentralized clinical trials: Perspectives for clinical research professionals. *ACRP.* 2022.
11. Lerner D, Palm ME, Concannon TW. Broadly engaged team science in clinical and translation research. 2022.
12. VanBuren, J.M., Casper, T.C., Nishijima, D.K. *et al.* The design of a Bayesian adaptive clinical trial of tranexamic acid in severely injured children. *Trials.* 2021;22:769. doi:10.1186/s13063-021-05737-0
13. Millar, M.M., Olson, L.M., VanBuren, J.M. *et al.* Incentive delivery timing and follow-up survey completion in a prospective cohort study of injured children: a randomized experiment comparing prepaid and postpaid incentives. *BMC Med Res Methodol.* 2021;21:233. doi:10.1186/s12874-021-01421-8
14. Perspectives on Clinical Trial Agreements: What Sites, Sponsors and Stakeholders Need; <https://www.centerwatch.com/products/547-perspectives-on-clinical-trial-agreements-what-sites-sponsors-and-stakeholders-need>
15. Fritter J, Metheney M, Zuspan SJ. Impact of a risk-based, study-specific training program on research coordinator competency. *Clinical Researcher.* 2020;34(6)
16. Selker HP, Eichler HG, Stockbridge NL, et al. Efficacy and Effectiveness Too Trials: Clinical Trial Designs to Generate Evidence on Efficacy and on Effectiveness in Wide Practice. *Clin Pharmacol Ther.* 2019;105(4):857-866. doi:10.1002/cpt.1347

17. Selker HP, Kwong M, Ruthazer R, et al. An example of medical device-based projection of clinical trial enrollment: Use of electrocardiographic data to identify candidates for a trial in acute coronary syndromes. *J Clin Transl Sci.* 2018;2(6):377-383. doi:10.1017/cts.2019.365
18. Selker HP, Eichler HG, Stockbridge NL, et al. Efficacy and Effectiveness Too Trials: Clinical Trial Designs to Generate Evidence on Efficacy and on Effectiveness in Wide Practice. *Clin Pharmacol Ther.* 2019;105(4):857-866. doi:10.1002/cpt.1347
19. Cheng AC, Duda SN, Taylor R, et al. REDCap on FHIR: Clinical Data Interoperability Services. *J Biomed Inform.* 2021;121:103871. doi:10.1016/j.jbi.2021.103871
20. Helmer TT, Lewis AA, McEver M, et al. Creating and implementing a COVID-19 recruitment Data Mart. *J Biomed Inform.* 2021;117:103765. doi:10.1016/j.jbi.2021.103765
21. Bell J, Cook S, Edwards TL, et al. Using a multicultural and multilingual awareness-raising strategy to enhance enrollment of racially underrepresented minoritized communities – the PassITON trial. *J Clin Transl Sci.* 2023;7(1):e9. doi:10.1017/cts.2022.506
22. Stallings SC, Cunningham-Erves J, Frazier C, et al. Development and Validation of the Perceptions of Research Trustworthiness Scale to Measure Trust Among Minoritized Racial and Ethnic Groups in Biomedical Research in the US. *JAMA Netw Open.* 2022;5(12):e2248812. doi:10.1001/jamanetworkopen.2022.48812
23. Grout RW, Hood D, Nelson SJ, Harris PA, Embí PJ. Selecting EHR-driven recruitment strategies: An evidence-based decision guide. *J Clin Transl Sci.* 2022;6(1):e108. doi:10.1017/cts.2022.439
24. Cunningham-Erves, J., Kusnoor, S.V., Villalta-Gil, V. et al. Development and pilot implementation of guidelines for culturally tailored research recruitment materials for African Americans and Latinos. *BMC Med Res Methodol.* 2022;22:248. doi:10.1186/s12874-022-01724-4
25. Harris PA, Swafford J, Serdoz ES, et al. MyCap: a flexible and configurable platform for mobilizing the participant voice. *JAMIA Open.* 2022;5(2):ooac047. doi:10.1093/jamiaopen/ooac047
26. Kennedy N, Nelson S, Jerome R. et al. Recruitment and retention for chronic pain clinical trials: a narrative review. *PAIN Reports.* 2022;7(4):e1007. doi: 10.1097/PR9.0000000000001007
27. Cook SK, Kennedy N, Boone L, et al. What we wish every investigator knew: Top 4 recruitment and retention recommendations from the Recruitment Innovation Center. *J Clin Transl Sci.* 2022;6(1):e31. doi:10.1017/cts.2022.370
28. Dunkel L, Byrne LM, Olson E, et al. “Send My Information”: Increasing public accessibility to clinical trials by facilitating participant expression of interest. *J Clin Transl Sci.* 2022;6(1):e26. doi:10.1017/cts.2022.19
29. Canedo JR, Villalta-Gil V, Grijalva CG, Schlundt D, Jerome RN, Wilkins CH. How do Hispanics/Latinos Perceive and Value the Return of Research Results? *Hispanic Health Care International.* 2022;20(4):238-247. doi:10.1177/15404153211070821
30. Nelson SJ, Drury B, Hood D, et al. EHR-based cohort assessment for multicenter RCTs: a fast and flexible model for identifying potential study sites. *JAMIA.* 2022;29(4): 652–659. doi:10.1093/jamia/ocab265

31. Bickman L, Domenico HJ, Byrne DW, et al. Effects of financial incentives on volunteering for clinical trials: A randomized vignette experiment. *Contemp Clin Trials*. 2021;110:106584. doi:10.1016/j.cct.2021.106584
32. Wilkins CH, Edwards TL, Stroud M, et al. The Recruitment Innovation Center: Developing novel, person-centered strategies for clinical trial recruitment and retention. *J Clin Transl Sci*. 2021;5(1):e194. doi:10.1017/cts.2021.841
33. Cook SK, Jerome RN, Dunagan J, et al. Engaging smokers in research: Utility of Facebook in facilitating recruitment to a smoking cessation study. *Contemp Clin Trials*. 2021;107:106461. doi:10.1016/j.cct.2021.106461
34. Kusnoor SV, Villalta-Gil V, Michaels M, et al. Design and implementation of a massive open online course on enhancing the recruitment of minorities in clinical trials - Faster Together. *BMC Med Res Methodol*. 2021;21(1):44. doi:10.1186/s12874-021-01240-x
35. Byrne LM, Cook SK, Kennedy N, et al. Opening doors to clinical trial participation among Hispanics: Lessons learned from the Spanish translation of ResearchMatch. *J Clin Transl Sci*. 2021;5(1):e46. doi:10.1017/cts.2020.539
36. Lawrence CE, Dunkel L, McEver M, et al. A REDCap-based model for electronic consent (eConsent): Moving toward a more personalized consent. *J Clin Transl Sci*. 2020;4(4):345-353. Published 2020 Apr 3. doi:10.1017/cts.2020.30
37. Skinner JS, Fair AM, Holman AS, Boyer AP, Wilkins CH. The Impact of an Educational Video on Clinical Trial Enrollment and Knowledge in Ethnic Minorities: A Randomized Control Trial. *Front Public Health*. 2019;7:104. doi:10.3389/fpubh.2019.00104
38. Jerome RN, Dunkel L, Kennedy N, et al. To end disease tomorrow, begin with trials today: Digital strategies for increased awareness of a clinical trials finder. *J Clin Transl Sci*. 2019;3(4):190-198. doi:10.1017/cts.2019.404
39. Kripalani, S., Heerman, W.J., Patel, N.J. *et al*. Association of Health Literacy and Numeracy with Interest in Research Participation. *J Gen Intern Med*. 2019;34:544–551 doi:10.1007/s11606-018-4766-2
40. Wilkins CH, Mapes BM, Jerome RN, Villalta-Gil V, Pulley JM, Harris PA. Understanding what information is valued by research participants, and why. *Health Aff*. 2019;38(3). doi:10.1377/hlthaff.2018.05046
41. Wilkins CH. Effective Engagement Requires Trust and Being Trustworthy. *Med Care*. 2018;56(10 Suppl 1):S6-S8. doi:10.1097/MLR.0000000000000953
42. Pulley JM, Jerome RN, Bernard GR, et al. Connecting the public with clinical trial options: The ResearchMatch Trials Today tool. *J Clin Transl Sci*. 2018;2(4):253-257. doi:10.1017/cts.2018.327
